# Supplementary material
Source: PubMed Central journal article supplement (PMC7807757)
Supplement: ao0c04603_si_001.pdf [file ao0c04603_si_001.pdf]

## Supporting Information

### Time-Dependent Naphthalene Toxicity in *Anabas testudineus* (Bloch): A Multiple Endpoint Biomarker Approach

Sukhendu Dey<sup>1</sup>, Puspita Ballav<sup>1</sup>, Palas Samanta<sup>2</sup>, Arghya Mandal<sup>1</sup>, Atanu Patra<sup>1</sup>, Subhas Das<sup>1</sup>, Arnab Kumar Mondal<sup>1</sup> and Apurba Ratan Ghosh<sup>1\*</sup>

<sup>1</sup> Department of Environmental Science, The University of Burdwan, Burdwan 713104, West Bengal, India

<sup>2</sup> Department of Environmental Science, Sukanta Mahavidyalaya, University of North Bengal, Dhupguri, West Bengal, India

Individual E-mail addresses: sukhendudey.envs@gmail.com (S. Dey), puspitaballav27762@gmail.com (P. Ballav), samanta.palas2010@gmail.com (P. Samanta), arghyamandal065@gmail.com (A. Mandal), atanupatraenvs@gmail.com (A. Patra), subhasfeo@gmail.com (S. Das), arnab1990mondal@gmail.com (A. K. Mondal) and apurbaghosh2010@gmail.com (A. R. Ghosh)

\* Corresponding author Address: Ecotoxicology Lab, Department of Environmental Science, The University of Burdwan, Golapbag, Burdwan 713104, West Bengal, India.

E-mail address: apurbaghosh2010@gmail.com

Tel. and fax: +919434003445

**Table S1:** Percentage of increase (+) or decrease (-) of different haematological parameters in *Anabas testudineus* under naphthalene exposures. Results of ‘Paired t test’ showed significant differences between control and treatment condition within each day of exposure except NS in superscript. Different letters represent significant differences among different exposure durations within each naphthalene exposure for a particular haematological parameter at  $p < 0.05$  (one-way ANOVA).

| Conditions | WBC               |                   | RBC                |                    | %LYM             |                  | Hb                  |                    | PCV                |                    | MCV                |                    | MCH               |                   | MCHC              |                   | PLT                |                    |
|------------|-------------------|-------------------|--------------------|--------------------|------------------|------------------|---------------------|--------------------|--------------------|--------------------|--------------------|--------------------|-------------------|-------------------|-------------------|-------------------|--------------------|--------------------|
|            | T1                | T2                | T1                 | T2                 | T1               | T2               | T1                  | T2                 | T1                 | T2                 | T1                 | T2                 | T1                | T2                | T1                | T2                | T1                 | T2                 |
| 1 Day      | 4.1 <sup>a</sup>  | 9.8 <sup>a</sup>  | -4 <sup>a</sup>    | -6.1 <sup>a</sup>  | 1.4 <sup>a</sup> | 1.8 <sup>a</sup> | -12.5 <sup>a</sup>  | -21.2 <sup>a</sup> | -10 <sup>a</sup>   | -14.6 <sup>a</sup> | 14 <sup>a</sup>    | 22 <sup>a</sup>    | 14.1 <sup>a</sup> | 33.2 <sup>a</sup> | 5.7 <sup>a</sup>  | 10.7 <sup>a</sup> | -7.9 <sup>a</sup>  | -12.7 <sup>a</sup> |
| 5 Days     | 3.5 <sup>ab</sup> | 8.5 <sup>b</sup>  | -5.3 <sup>ab</sup> | -7.6 <sup>a</sup>  | 1.2 <sup>b</sup> | 1.5 <sup>b</sup> | -14 <sup>ab</sup>   | -22.3 <sup>a</sup> | -10.3 <sup>a</sup> | -15.1 <sup>a</sup> | 14.6 <sup>ab</sup> | 22.8 <sup>ab</sup> | 16.5 <sup>b</sup> | 34.1 <sup>a</sup> | 7.7 <sup>b</sup>  | 13.6 <sup>b</sup> | -8.8 <sup>a</sup>  | -14.4 <sup>b</sup> |
| 10 Days    | 3 <sup>b</sup>    | 7.9 <sup>c</sup>  | -6.6 <sup>b</sup>  | -9.6 <sup>b</sup>  | 1.1 <sup>b</sup> | 1.2 <sup>c</sup> | -14.8 <sup>bc</sup> | -23.5 <sup>b</sup> | -11.3 <sup>b</sup> | -15.7 <sup>b</sup> | 15.2 <sup>ab</sup> | 23.6 <sup>bc</sup> | 17.9 <sup>c</sup> | 35.9 <sup>b</sup> | 9.7 <sup>c</sup>  | 17.6 <sup>c</sup> | -10 <sup>b</sup>   | -15.4 <sup>c</sup> |
| 15 Days    | 2.8 <sup>c</sup>  | 7.8 <sup>bc</sup> | -8.6 <sup>c</sup>  | -11.2 <sup>b</sup> | 0.9 <sup>c</sup> | 1 <sup>d</sup>   | -15.6 <sup>c</sup>  | -24.4 <sup>b</sup> | -12.4 <sup>c</sup> | -16.3 <sup>c</sup> | 16 <sup>b</sup>    | 24.2 <sup>bc</sup> | 19.7 <sup>d</sup> | 38.8 <sup>c</sup> | 10.9 <sup>c</sup> | 19.9 <sup>d</sup> | -11.1 <sup>c</sup> | -18.6 <sup>d</sup> |
| 21 Days    | 2.5 <sup>c</sup>  | 7.7 <sup>c</sup>  | -10.9 <sup>c</sup> | -13 <sup>c</sup>   | 0.5 <sup>d</sup> | 0.9 <sup>d</sup> | -16.2 <sup>c</sup>  | -25.6 <sup>b</sup> | -12.7 <sup>c</sup> | -17.3 <sup>c</sup> | 16.7 <sup>c</sup>  | 24.8 <sup>c</sup>  | 20.9 <sup>e</sup> | 40 <sup>c</sup>   | 13.5 <sup>d</sup> | 21.2 <sup>d</sup> | -12.5 <sup>d</sup> | -19.7 <sup>e</sup> |

**Table S2:** Percentage of increase (+) or decrease (-) of different serum biochemical parameters in *Anabas testudineus* under naphthalene exposures. Results of ‘Paired *t* test’ showed significant differences between control and treatment condition within each exposure day except NS in superscript. Different letters represent significant differences among different exposure durations within each naphthalene exposure for a particular haematological parameter at  $p < 0.05$  (one-way ANOVA).

| Conditions | CHOLES            |                   | Trig               |                     | LDL                |                    | HDL                |                     | Ca                 |                    | GLU               |                   |
|------------|-------------------|-------------------|--------------------|---------------------|--------------------|--------------------|--------------------|---------------------|--------------------|--------------------|-------------------|-------------------|
|            | T1                | T2                | T1                 | T2                  | T1                 | T2                 | T1                 | T2                  | T1                 | T2                 | T1                | T2                |
| 1 Day      | 34.7 <sup>a</sup> | 28 <sup>a</sup>   | 10 <sup>a</sup>    | 15.8 <sup>a</sup>   | -17.1 <sup>a</sup> | -22.2 <sup>a</sup> | -13.7 <sup>a</sup> | -18.9 <sup>a</sup>  | -17.2 <sup>a</sup> | -20.7 <sup>a</sup> | 18.4 <sup>a</sup> | 21.3 <sup>a</sup> |
| 5 Days     | 45.7 <sup>b</sup> | 51.5 <sup>b</sup> | 5.1 <sup>b</sup>   | 6.7 <sup>b</sup>    | 0.9 <sup>bNS</sup> | 2 <sup>bNS</sup>   | -8.1 <sup>b</sup>  | -0.6 <sup>bNS</sup> | -12.1 <sup>a</sup> | -6.9 <sup>b</sup>  | 26.9 <sup>b</sup> | 33.3 <sup>b</sup> |
| 10 Days    | 54.1 <sup>c</sup> | 63.3 <sup>c</sup> | -5.2 <sup>c</sup>  | -0.5 <sup>cNS</sup> | 7.1 <sup>c</sup>   | 10 <sup>c</sup>    | 12.1 <sup>c</sup>  | 19.4 <sup>c</sup>   | 1.7 <sup>bNS</sup> | 8.6 <sup>c</sup>   | 39 <sup>c</sup>   | 50 <sup>c</sup>   |
| 15 Days    | 59.3 <sup>d</sup> | 69.1 <sup>d</sup> | -13.5 <sup>d</sup> | -9.2 <sup>d</sup>   | 13 <sup>d</sup>    | 16.9 <sup>d</sup>  | 37.8 <sup>d</sup>  | 34.8 <sup>d</sup>   | 12 <sup>b</sup>    | 17.2 <sup>d</sup>  | 43.4 <sup>d</sup> | 54.2 <sup>d</sup> |
| 21 Days    | 64.5 <sup>e</sup> | 72.6 <sup>e</sup> | -15.8 <sup>d</sup> | -12.4 <sup>d</sup>  | 21 <sup>e</sup>    | 25.5 <sup>e</sup>  | 46.9 <sup>e</sup>  | 58.5 <sup>e</sup>   | 24.1 <sup>bc</sup> | 29.3 <sup>e</sup>  | 52.7 <sup>e</sup> | 61.7 <sup>e</sup> |
